# Supplementary material for: Closed-Loop Fault Diagnosis of SDR Using Gap Metric, PCA, and Kalman’s Principle
Source: Hindawi journal article supplement (doi:10.1155/2023/9994093), 2023-01-05
Supplement: f1 [file 9994093.f1.docx]

**Part A**

Subtraction of the two sensors’ measured values can also reflect the difference between them (As shown in Equation S1), but can last for a longer time for detection. As shown in Figure S1, at the 10th second, a sudden disturbance was applied to , the disturbance amount was 0.2 MPa, and the disturbance duration was 0.01 second (No disturbance was applied to ). It could be seen that the effect of was about 0.02 s, and the total action time of was about 0.07 seconds (It was the sum of the window movement length d and 0.02 seconds). Therefore, we could use different window lengths to configure the detection duration of sudden fault. That is, is more suitable for fault diagnosis than .

(S1)


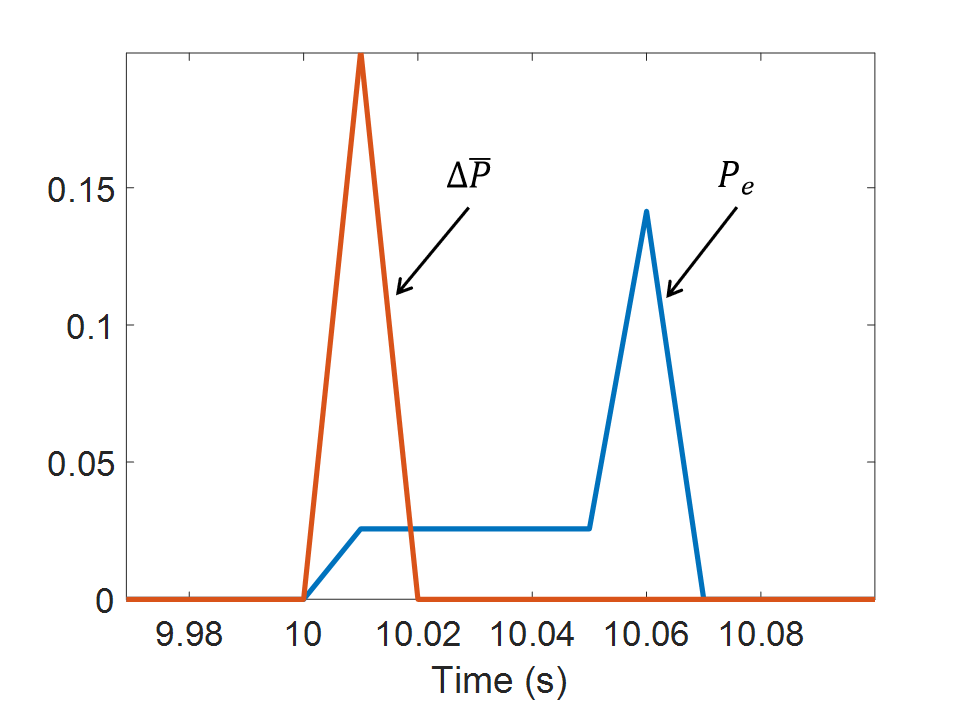


Figure S1 The and under sudden fault

**Part B**

The following assumptions need to be made in the process of establishing the mathematical model of the gas generator: the solid grain is burnt on the end face, and the end face area remains unchanged; the gas parameters in the gas generator are equal everywhere; the gas is suitable for ideal gas state equation; the gas temperature in the gas generator remains unchanged; the burning rate of the burning surface of the grain is equal everywhere, and the burning rate conforms to the equation (S2).

|  | (S2) |
| --- | --- |

The mathematical model of the gas generator (GG) can be described by equation (S3) - (S5). They represent the gas flow rate generated by burning solid propellant, the gas flow rate being discharged through the throat, and the mass conservation equation of Gas Generator.

|  | (S3) |
| --- | --- |
|  | (S4) |
|  | (S5) |

Where , , is the gas flow rate generated by burning solid propellant, is gas density in the gas generator, is initial free-volume. Other variables have the same meaning as in the text.

Then the mass conservation equation at a certain moment can be described as equation (S6) and because of , equation (S6) can be simplified to equation (S7).

| , | (S6) |
| --- | --- |
| , | (S7) |

**Part C**

Table S1: Offset of pressure when the fault was isolation (Fault Type A)

|  | 0.002 | 0.004 | 0.006 | 0.008 | 0.010 | 0.012 | 0.014 | 0.016 | 0.018 | 0.020 |
| --- | --- | --- | --- | --- | --- | --- | --- | --- | --- | --- |
| 0.6 | 0.0342 | 0.0329 | 0.0322 | 0.0314 | 0.0302 | 0.0293 | 0.0283 | 0.0270 | 0.0265 | 0.0260 |
| 0.7 | 0.0341 | 0.0326 | 0.0320 | 0.0311 | 0.0298 | 0.0288 | 0.0279 | 0.0266 | 0.0261 | 0.0256 |
| 0.8 | 0.0337 | 0.0322 | 0.0313 | 0.0302 | 0.0287 | 0.0276 | 0.0265 | 0.0251 | 0.0246 | 0.0240 |
| 0.9 | 0.0334 | 0.0317 | 0.0306 | 0.0291 | 0.0275 | 0.0262 | 0.0251 | 0.0236 | 0.0230 | 0.0223 |
| 1.0 | 0.0332 | 0.0315 | 0.0302 | 0.0286 | 0.027 | 0.0256 | 0.0245 | 0.023 | 0.0224 | 0.0217 |
| 1.1 | 0.0330 | 0.0311 | 0.0297 | 0.0278 | 0.0261 | 0.0247 | 0.0236 | 0.0221 | 0.0214 | 0.0207 |
| 1.2 | 0.0330 | 0.0312 | 0.0298 | 0.0279 | 0.0261 | 0.0248 | 0.0237 | 0.0222 | 0.0216 | 0.0209 |
| 1.3 | 0.0328 | 0.0309 | 0.0294 | 0.0273 | 0.0254 | 0.024 | 0.0228 | 0.0214 | 0.0208 | 0.0200 |
| 1.4 | 0.0326 | 0.0307 | 0.029 | 0.0268 | 0.0248 | 0.0234 | 0.0222 | 0.0207 | 0.0202 | 0.0194 |
| 1.5 | 0.0325 | 0.0305 | 0.0288 | 0.0264 | 0.0244 | 0.0229 | 0.0216 | 0.0202 | 0.0196 | 0.0189 |
| 1.6 | 0.0324 | 0.0305 | 0.0288 | 0.0264 | 0.0243 | 0.0228 | 0.0215 | 0.02 | 0.0194 | 0.0187 |
| 1.7 | 0.0324 | 0.0304 | 0.0287 | 0.0263 | 0.0241 | 0.0226 | 0.0212 | 0.0197 | 0.0192 | 0.0184 |
| 1.8 | 0.0321 | 0.0300 | 0.0280 | 0.0254 | 0.0231 | 0.0216 | 0.0202 | 0.0187 | 0.0181 | 0.0173 |
| 1.9 | 0.0320 | 0.0300 | 0.0280 | 0.0254 | 0.0232 | 0.0216 | 0.0202 | 0.0187 | 0.0181 | 0.0174 |
| 2.0 | 0.0320 | 0.0300 | 0.0280 | 0.0254 | 0.0258 | 0.0216 | 0.0202 | 0.0187 | 0.0191 | 0.0207 |
| 2.1 | 0.0318 | 0.0297 | 0.0276 | 0.0248 | 0.0244 | 0.021 | 0.0196 | 0.0188 | 0.0201 | 0.0212 |
| 2.2 | 0.0317 | 0.0296 | 0.0275 | 0.0248 | 0.0244 | 0.0209 | 0.0195 | 0.0197 | 0.0210 | 0.0222 |
| 2.3 | 0.0314 | 0.0292 | 0.0275 | 0.0240 | 0.0234 | 0.0201 | 0.0187 | 0.0191 | 0.0204 | 0.0217 |
| 2.4 | 0.0312 | 0.0289 | 0.0279 | 0.0239 | 0.0240 | 0.0201 | 0.0187 | 0.0190 | 0.0205 | 0.0218 |
| 2.5 | 0.0312 | 0.0288 | 0.0264 | 0.0234 | 0.0210 | 0.0194 | 0.0180 | 0.0165 | 0.0169 | 0.0176 |
| 2.6 | 0.0309 | 0.0284 | 0.0258 | 0.0228 | 0.0204 | 0.0189 | 0.0176 | 0.0170 | 0.0180 | 0.0189 |
| 2.7 | 0.0310 | 0.0286 | 0.0260 | 0.0229 | 0.0205 | 0.0190 | 0.0176 | 0.0184 | 0.0198 | 0.0211 |
| 2.8 | 0.0308 | 0.0284 | 0.0258 | 0.0227 | 0.0203 | 0.0188 | 0.0174 | 0.0180 | 0.0191 | 0.0203 |
| 2.9 | 0.0310 | 0.0287 | 0.0262 | 0.0231 | 0.0206 | 0.0191 | 0.0183 | 0.0195 | 0.0203 | 0.0215 |
| 3.0 | 0.0305 | 0.0279 | 0.0251 | 0.0219 | 0.0196 | 0.0181 | 0.0168 | 0.0170 | 0.0178 | 0.0181 |
| 3.1 | 0.0306 | 0.0282 | 0.0254 | 0.0222 | 0.0197 | 0.0182 | 0.0169 | 0.0179 | 0.0188 | 0.0197 |
| 3.2 | 0.0307 | 0.0285 | 0.0258 | 0.0226 | 0.0201 | 0.0186 | 0.0173 | 0.0184 | 0.0193 | 0.0199 |
| 3.3 | 0.0308 | 0.0287 | 0.0262 | 0.0230 | 0.0205 | 0.0190 | 0.0185 | 0.0200 | 0.0213 | 0.0223 |
| 3.4 | 0.0302 | 0.0277 | 0.0247 | 0.0213 | 0.0188 | 0.0186 | 0.0204 | 0.0220 | 0.0229 | 0.0235 |
| 3.5 | 0.0303 | 0.0279 | 0.0250 | 0.0217 | 0.0192 | 0.0197 | 0.0218 | 0.0237 | 0.0251 | 0.0260 |
| 3.6 | 0.0300 | 0.0273 | 0.0242 | 0.0208 | 0.0183 | 0.0181 | 0.0201 | 0.0217 | 0.0230 | 0.0239 |
| 3.7 | 0.0301 | 0.0276 | 0.0246 | 0.0212 | 0.0186 | 0.0183 | 0.0200 | 0.0211 | 0.0220 | 0.0225 |
| 3.8 | 0.0296 | 0.0269 | 0.0235 | 0.0232 | 0.0175 | 0.0160 | 0.0170 | 0.0184 | 0.0197 | 0.0209 |
| 3.9 | 0.0297 | 0.0271 | 0.0239 | 0.0229 | 0.0178 | 0.0164 | 0.0178 | 0.0188 | 0.0199 | 0.0210 |
| 4.0 | 0.0298 | 0.0274 | 0.0242 | 0.0221 | 0.0181 | 0.0168 | 0.0183 | 0.0196 | 0.0208 | 0.0221 |
| 4.1 | 0.0299 | 0.0276 | 0.0245 | 0.0233 | 0.0183 | 0.0172 | 0.0189 | 0.0202 | 0.0215 | 0.0226 |
| 4.2 | 0.0300 | 0.0279 | 0.0248 | 0.0261 | 0.0186 | 0.0186 | 0.0208 | 0.0228 | 0.0246 | 0.0262 |
| 4.3 | 0.0309 | 0.0296 | 0.0275 | 0.0241 | 0.0214 | 0.0219 | 0.0245 | 0.0258 | 0.0271 | 0.0287 |
| 4.4 | 0.0309 | 0.0297 | 0.0300 | 0.0244 | 0.0218 | 0.0241 | 0.0264 | 0.0289 | 0.0311 | 0.0325 |
| 4.5 | 0.0320 | 0.0315 | 0.0313 | 0.0283 | 0.0254 | 0.0271 | 0.0308 | 0.0343 | 0.0371 | 0.0388 |

Table S2: Offset of pressure when the fault was isolation (Fault Type B1, )

|  | 0.002 | 0.004 | 0.006 | 0.008 | 0.01 | 0.012 | 0.014 | 0.016 | 0.018 | 0.02 |
| --- | --- | --- | --- | --- | --- | --- | --- | --- | --- | --- |
| 0.6 | 0.1202 | 0.1084 | 0.1285 | 0.1362 | 0.1201 | 0.1339 | 0.1318 | 0.1299 | 0.1475 | 0.1465 |
| 0.7 | 0.1459 | 0.1599 | 0.1480 | 0.1546 | 0.1433 | 0.1474 | 0.1564 | 0.1631 | 0.1721 | 0.1651 |
| 0.8 | 0.1646 | 0.1665 | 0.1597 | 0.1773 | 0.1657 | 0.1635 | 0.1536 | 0.1730 | 0.1746 | 0.1666 |
| 0.9 | 0.2070 | 0.1785 | 0.1724 | 0.2001 | 0.1666 | 0.1697 | 0.1540 | 0.1735 | 0.1931 | 0.1766 |
| 1.0 | 0.2070 | 0.2337 | 0.2402 | 0.2305 | 0.2227 | 0.1992 | 0.1978 | 0.1855 | 0.1967 | 0.2170 |
| 1.1 | 0.2075 | 0.2563 | 0.2485 | 0.2318 | 0.2618 | 0.2399 | 0.2319 | 0.2224 | 0.2054 | 0.2163 |
| 1.2 | 0.2449 | 0.2671 | 0.2667 | 0.2332 | 0.2613 | 0.2798 | 0.2346 | 0.2361 | 0.2510 | 0.2740 |
| 1.3 | 0.2752 | 0.2791 | 0.2703 | 0.2822 | 0.2620 | 0.3129 | 0.2872 | 0.2676 | 0.2643 | 0.2780 |
| 1.4 | 0.3086 | 0.2916 | 0.3255 | 0.3181 | 0.2905 | 0.3426 | 0.3336 | 0.2765 | 0.3015 | 0.2883 |
| 1.5 | 0.3136 | 0.3358 | 0.3279 | 0.3578 | 0.3579 | 0.3442 | 0.3409 | 0.3509 | 0.3066 | 0.2916 |
| 1.6 | 0.3139 | 0.3882 | 0.3514 | 0.3611 | 0.3575 | 0.3478 | 0.3434 | 0.3852 | 0.3619 | 0.3343 |
| 1.7 | 0.3645 | 0.4124 | 0.3517 | 0.3610 | 0.3960 | 0.3881 | 0.3989 | 0.3882 | 0.3931 | 0.4004 |
| 1.8 | 0.3644 | 0.4109 | 0.3978 | 0.4374 | 0.4092 | 0.4285 | 0.3979 | 0.3901 | 0.4303 | 0.4035 |
| 1.9 | 0.4401 | 0.4744 | 0.4677 | 0.4667 | 0.4423 | 0.4373 | 0.4060 | 0.4511 | 0.4336 | 0.4291 |
| 2.0 | 0.4401 | 0.4874 | 0.4720 | 0.4656 | 0.4434 | 0.4743 | 0.4486 | 0.4529 | 0.4337 | 0.4293 |
| 2.1 | 0.4888 | 0.4969 | 0.4947 | 0.4653 | 0.4433 | 0.4831 | 0.5021 | 0.4547 | 0.4583 | 0.4801 |
| 2.2 | 0.4885 | 0.4961 | 0.4971 | 0.4988 | 0.4798 | 0.4838 | 0.5586 | 0.4601 | 0.5089 | 0.4786 |
| 2.3 | 0.4890 | 0.5549 | 0.4981 | 0.5007 | 0.5331 | 0.4839 | 0.5582 | 0.5243 | 0.5105 | 0.5040 |
| 2.4 | 0.5677 | 0.5580 | 0.5500 | 0.5625 | 0.5312 | 0.5286 | 0.5536 | 0.5797 | 0.5197 | 0.5020 |
| 2.5 | 0.6237 | 0.6061 | 0.5484 | 0.5634 | 0.5692 | 0.5256 | 0.5486 | 0.6236 | 0.5892 | 0.5555 |
| 2.6 | 0.6321 | 0.6224 | 0.5799 | 0.6188 | 0.5688 | 0.6199 | 0.5534 | 0.6170 | 0.5830 | 0.5599 |
| 2.7 | 0.6406 | 0.6227 | 0.6071 | 0.6231 | 0.5693 | 0.6271 | 0.6088 | 0.6236 | 0.6870 | 0.5728 |
| 2.8 | 0.6740 | 0.6200 | 0.6088 | 0.6501 | 0.6750 | 0.6234 | 0.6101 | 0.6232 | 0.6837 | 0.6491 |
| 2.9 | 0.7056 | 0.6890 | 0.6623 | 0.6524 | 0.6887 | 0.6222 | 0.7130 | 0.6252 | 0.6862 | 0.6574 |
| 3.0 | 0.7131 | 0.6890 | 0.6623 | 0.6493 | 0.7003 | 0.6268 | 0.7174 | 0.6239 | 0.6886 | 0.6567 |
| 3.1 | 0.7118 | 0.6887 | 0.6909 | 0.6934 | 0.7483 | 0.6716 | 0.7169 | 0.6247 | 0.6852 | 0.6603 |
| 3.2 | 0.7636 | 0.7639 | 0.7283 | 0.6939 | 0.756 | 0.6738 | 0.7193 | 0.6877 | 0.6886 | 0.6698 |
| 3.3 | 0.7770 | 0.8061 | 0.7944 | 0.6953 | 0.7603 | 0.6788 | 0.7260 | 0.8108 | 0.6940 | 0.7655 |
| 3.4 | 0.8081 | 0.8765 | 0.8326 | 0.7712 | 0.7703 | 0.8069 | 0.7267 | 0.8200 | 0.7004 | 0.7715 |
| 3.5 | 0.8492 | 0.8786 | 0.8443 | 0.7806 | 0.8257 | 0.8206 | 0.8033 | 0.8303 | 0.7177 | 0.7832 |
| 3.6 | 0.8694 | 0.9161 | 0.8762 | 0.8231 | 0.8302 | 0.9367 | 0.8113 | 0.8464 | 0.8252 | 0.8005 |
| 3.7 | 0.8720 | 0.9284 | 0.9269 | 0.8376 | 0.8468 | 0.9437 | 0.8274 | 0.8697 | 0.9561 | 0.8135 |
| 3.8 | 0.8837 | 0.9713 | 0.9311 | 0.8407 | 0.8500 | 0.9533 | 0.8373 | 0.8789 | 0.9566 | 0.8303 |
| 3.9 | 0.9397 | 0.9872 | 0.9542 | 0.9282 | 0.9047 | 0.9579 | 0.9923 | 0.9514 | 0.9607 | 0.8469 |
| 4.0 | 0.9397 | 0.9854 | 0.9545 | 1.0044 | 0.9985 | 1.0108 | 0.9953 | 0.9515 | 0.9722 | 0.9491 |
| 4.1 | 0.9680 | 1.0124 | 0.9900 | 1.0083 | 1.0007 | 1.0124 | 1.0005 | 0.9551 | 0.9789 | 0.9568 |
| 4.2 | 1.0682 | 1.0395 | 0.9910 | 1.0121 | 1.0480 | 1.0163 | 1.0061 | 0.9572 | 0.9831 | 1.0685 |
| 4.3 | 1.0590 | 1.0398 | 0.9936 | 1.0588 | 1.0516 | 1.0193 | 1.0099 | 0.9630 | 0.9839 | 1.0745 |
| 4.4 | 1.0980 | 1.0404 | 0.9927 | 1.0578 | 1.0508 | 1.0224 | 1.0144 | 0.9680 | 0.9884 | 1.0814 |
| 4.5 | 1.0985 | 1.0837 | 0.9958 | 1.1030 | 1.0534 | 1.0871 | 1.0179 | 1.1485 | 1.0775 | 1.0858 |

Table S3: Offset of pressure when the fault was isolation (Fault Type B2, , )

|  | 0.002 | 0.004 | 0.006 | 0.008 | 0.01 | 0.012 | 0.014 | 0.016 | 0.018 | 0.02 |
| --- | --- | --- | --- | --- | --- | --- | --- | --- | --- | --- |
| 0.6 | 0.1148 | 0.1253 | 0.1259 | 0.1081 | 0.1154 | 0.1289 | 0.1209 | 0.1372 | 0.1312 | 0.1258 |
| 0.7 | 0.1149 | 0.134 | 0.1271 | 0.1083 | 0.1454 | 0.1479 | 0.1522 | 0.1556 | 0.1547 | 0.1401 |
| 0.8 | 0.1574 | 0.1646 | 0.1438 | 0.167 | 0.1446 | 0.1593 | 0.1696 | 0.1773 | 0.1739 | 0.1403 |
| 0.9 | 0.1834 | 0.207 | 0.1926 | 0.1786 | 0.1999 | 0.1723 | 0.185 | 0.1787 | 0.1979 | 0.1661 |
| 1.0 | 0.2063 | 0.2078 | 0.2184 | 0.1909 | 0.2161 | 0.2402 | 0.2021 | 0.2305 | 0.2009 | 0.2218 |
| 1.1 | 0.2431 | 0.2447 | 0.2367 | 0.2663 | 0.2377 | 0.2585 | 0.2485 | 0.2318 | 0.2371 | 0.2488 |
| 1.2 | 0.2515 | 0.2449 | 0.2526 | 0.2677 | 0.2753 | 0.2671 | 0.2885 | 0.2332 | 0.2569 | 0.2626 |
| 1.3 | 0.2815 | 0.2502 | 0.3023 | 0.2796 | 0.2941 | 0.2691 | 0.2899 | 0.2822 | 0.2594 | 0.2866 |
| 1.4 | 0.2975 | 0.3085 | 0.3104 | 0.2919 | 0.3324 | 0.2863 | 0.3139 | 0.33 | 0.2934 | 0.2911 |
| 1.5 | 0.3345 | 0.3138 | 0.3398 | 0.3325 | 0.3322 | 0.35 | 0.3132 | 0.3608 | 0.322 | 0.3516 |
| 1.6 | 0.3551 | 0.3139 | 0.374 | 0.3888 | 0.3636 | 0.3514 | 0.38 | 0.3591 | 0.3598 | 0.3927 |
| 1.7 | 0.3596 | 0.3648 | 0.3746 | 0.4121 | 0.3646 | 0.3522 | 0.4097 | 0.3826 | 0.4022 | 0.3961 |
| 1.8 | 0.3595 | 0.3644 | 0.4193 | 0.412 | 0.3924 | 0.3976 | 0.4104 | 0.4197 | 0.4012 | 0.4092 |
| 1.9 | 0.42 | 0.4401 | 0.4506 | 0.4744 | 0.4434 | 0.4677 | 0.4093 | 0.4667 | 0.4012 | 0.4423 |
| 2.0 | 0.4337 | 0.4401 | 0.4689 | 0.4847 | 0.456 | 0.4682 | 0.4404 | 0.465 | 0.4685 | 0.4438 |
| 2.1 | 0.4908 | 0.5011 | 0.4689 | 0.4969 | 0.5096 | 0.4739 | 0.5012 | 0.465 | 0.472 | 0.443 |
| 2.2 | 0.4907 | 0.4885 | 0.5234 | 0.4961 | 0.5109 | 0.4971 | 0.5477 | 0.4976 | 0.5202 | 0.5209 |
| 2.3 | 0.516 | 0.489 | 0.5229 | 0.556 | 0.5107 | 0.4981 | 0.5475 | 0.5007 | 0.5187 | 0.5331 |
| 2.4 | 0.5401 | 0.593 | 0.5233 | 0.5821 | 0.5089 | 0.5504 | 0.5778 | 0.5625 | 0.5187 | 0.5365 |
| 2.5 | 0.5628 | 0.591 | 0.5898 | 0.5946 | 0.509 | 0.5484 | 0.5741 | 0.5634 | 0.5175 | 0.5695 |
| 2.6 | 0.5626 | 0.6321 | 0.6018 | 0.6206 | 0.6136 | 0.5481 | 0.5728 | 0.6163 | 0.6249 | 0.5689 |
| 2.7 | 0.6048 | 0.6406 | 0.6312 | 0.6209 | 0.6675 | 0.6071 | 0.6092 | 0.6234 | 0.6333 | 0.5697 |
| 2.8 | 0.604 | 0.6732 | 0.6544 | 0.6416 | 0.6862 | 0.6088 | 0.6356 | 0.6498 | 0.6802 | 0.6142 |
| 2.9 | 0.6773 | 0.7056 | 0.6971 | 0.6893 | 0.7138 | 0.6627 | 0.6365 | 0.6513 | 0.6881 | 0.6761 |
| 3.0 | 0.697 | 0.7131 | 0.7121 | 0.689 | 0.7158 | 0.6623 | 0.6689 | 0.6527 | 0.6926 | 0.7003 |
| 3.1 | 0.6962 | 0.714 | 0.7249 | 0.6885 | 0.7505 | 0.7237 | 0.6705 | 0.6934 | 0.7243 | 0.7466 |
| 3.2 | 0.7355 | 0.7145 | 0.7266 | 0.7841 | 0.7694 | 0.7288 | 0.7035 | 0.7216 | 0.7253 | 0.7497 |
| 3.3 | 0.7362 | 0.777 | 0.798 | 0.7871 | 0.7734 | 0.7947 | 0.7065 | 0.7269 | 0.7273 | 0.7603 |
| 3.4 | 0.7903 | 0.8091 | 0.7999 | 0.8409 | 0.8026 | 0.8326 | 0.7112 | 0.7709 | 0.7339 | 0.762 |
| 3.5 | 0.8367 | 0.8672 | 0.8515 | 0.8803 | 0.8108 | 0.8731 | 0.8277 | 0.7806 | 0.7926 | 0.8257 |
| 3.6 | 0.842 | 0.8675 | 0.8907 | 0.9152 | 0.8159 | 0.9234 | 0.8299 | 0.8231 | 0.7981 | 0.8279 |
| 3.7 | 0.8658 | 0.8833 | 0.917 | 0.946 | 0.8554 | 0.9277 | 0.8784 | 0.8376 | 0.898 | 0.846 |
| 3.8 | 0.8442 | 0.8836 | 0.9351 | 0.948 | 0.8846 | 0.9311 | 0.8813 | 0.8423 | 0.94 | 0.8529 |
| 3.9 | 0.9766 | 0.9397 | 0.9683 | 0.9717 | 0.8862 | 0.9542 | 0.9616 | 0.9282 | 0.9429 | 0.9047 |
| 4.0 | 0.9769 | 0.9396 | 0.9683 | 1.0084 | 1.0018 | 0.9545 | 0.9633 | 0.9297 | 0.9443 | 0.9977 |
| 4.1 | 0.9772 | 1.0208 | 1.0067 | 1.0121 | 1.0677 | 0.9896 | 0.9666 | 1.0083 | 0.9451 | 0.9996 |
| 4.2 | 1.0236 | 1.0568 | 1.0075 | 1.0394 | 1.0693 | 0.9909 | 1.0424 | 1.0134 | 1.004 | 1.048 |
| 4.3 | 1.0367 | 1.0852 | 1.0087 | 1.0398 | 1.1085 | 0.9936 | 1.0811 | 1.0586 | 1.0477 | 1.0516 |
| 4.4 | 1.0596 | 1.0855 | 1.0553 | 1.0404 | 1.1111 | 0.9952 | 1.0832 | 1.0578 | 1.1314 | 1.0527 |
| 4.5 | 1.0832 | 1.0984 | 1.0562 | 1.0638 | 1.1184 | 0.9958 | 1.0876 | 1.103 | 1.1357 | 1.0534 |

Table S4: Precision degradation fault flag

(Fault Type C1, , , )

|  | 0.5% | 1.0% | 1.5% | 2.0% | 2.5% | 3.0% | 3.5% | 4.0% | 4.5% | 5.0% |
| --- | --- | --- | --- | --- | --- | --- | --- | --- | --- | --- |
| 0.6 | 0 | 1 | 1 | 1 | 1 | 1 | 1 | 1 | 1 | 1 |
| 0.7 | 0 | 1 | 1 | 1 | 1 | 1 | 1 | 1 | 1 | 1 |
| 0.8 | 0 | 1 | 1 | 1 | 1 | 1 | 1 | 1 | 1 | 1 |
| 0.9 | 0 | 1 | 1 | 1 | 1 | 1 | 1 | 1 | 1 | 1 |
| 1.0 | 0 | 1 | 1 | 1 | 1 | 1 | 1 | 1 | 1 | 1 |
| 1.1 | 1 | 1 | 1 | 1 | 1 | 1 | 1 | 1 | 1 | 1 |
| 1.2 | 1 | 1 | 1 | 1 | 1 | 1 | 1 | 1 | 1 | 1 |
| 1.3 | 1 | 1 | 1 | 1 | 1 | 1 | 1 | 1 | 1 | 1 |
| 1.4 | 1 | 1 | 1 | 1 | 1 | 1 | 1 | 1 | 1 | 1 |
| 1.5 | 1 | 1 | 1 | 1 | 1 | 1 | 1 | 1 | 1 | 1 |
| 1.6 | 1 | 1 | 1 | 1 | 1 | 1 | 1 | 1 | 1 | 1 |
| 1.7 | 1 | 1 | 1 | 1 | 1 | 1 | 1 | 1 | 1 | 1 |
| 1.8 | 1 | 1 | 1 | 1 | 1 | 1 | 1 | 1 | 1 | 1 |
| 1.9 | 1 | 1 | 1 | 1 | 1 | 1 | 1 | 1 | 1 | 1 |
| 2.0 | 1 | 1 | 1 | 1 | 1 | 1 | 1 | 1 | 1 | 1 |
| 2.1 | 1 | 1 | 1 | 1 | 1 | 1 | 1 | 1 | 1 | 1 |
| 2.2 | 1 | 1 | 1 | 1 | 1 | 1 | 1 | 1 | 1 | 1 |
| 2.3 | 1 | 1 | 1 | 1 | 1 | 1 | 1 | 1 | 1 | 1 |
| 2.4 | 1 | 1 | 1 | 1 | 1 | 1 | 1 | 1 | 1 | 1 |
| 2.5 | 1 | 1 | 1 | 1 | 1 | 1 | 1 | 1 | 1 | 1 |
| 2.6 | 1 | 1 | 1 | 1 | 1 | 1 | 1 | 1 | 1 | 1 |
| 2.7 | 1 | 1 | 1 | 1 | 1 | 1 | 1 | 1 | 1 | 1 |
| 2.8 | 1 | 1 | 1 | 1 | 1 | 1 | 1 | 1 | 1 | 1 |
| 2.9 | 1 | 1 | 1 | 1 | 1 | 1 | 1 | 1 | 1 | 1 |
| 3.0 | 1 | 1 | 1 | 1 | 1 | 1 | 1 | 1 | 1 | 1 |
| 3.1 | 1 | 1 | 1 | 1 | 1 | 1 | 1 | 1 | 0 | 1 |
| 3.2 | 1 | 1 | 1 | 1 | 1 | 1 | 1 | 1 | 0 | 1 |
| 3.3 | 1 | 1 | 1 | 1 | 1 | 1 | 1 | 0 | 1 | 1 |
| 3.4 | 1 | 1 | 1 | 1 | 1 | 1 | 1 | 0 | 1 | 1 |
| 3.5 | 1 | 1 | 1 | 1 | 1 | 1 | 1 | 1 | 0 | 0 |
| 3.6 | 1 | 1 | 1 | 1 | 1 | 1 | 1 | 1 | 1 | 1 |
| 3.7 | 1 | 1 | 1 | 1 | 1 | 1 | 1 | 1 | 1 | 1 |
| 3.8 | 1 | 1 | 1 | 1 | 1 | 1 | 0 | 1 | 1 | 0 |
| 3.9 | 1 | 1 | 1 | 1 | 1 | 1 | 1 | 1 | 1 | 1 |
| 4.0 | 1 | 1 | 1 | 1 | 1 | 1 | 1 | 0 | 1 | 1 |
| 4.1 | 1 | 1 | 1 | 1 | 1 | 1 | 1 | 1 | 1 | 0 |
| 4.2 | 1 | 1 | 1 | 1 | 1 | 1 | 1 | 0 | 1 | 1 |
| 4.3 | 1 | 1 | 1 | 1 | 1 | 1 | 1 | 1 | 0 | 1 |
| 4.4 | 1 | 1 | 1 | 1 | 1 | 1 | 1 | 1 | 1 | 1 |
| 4.5 | 1 | 1 | 1 | 1 | 1 | 1 | 1 | 1 | 1 | 1 |

Table S5: Precision degradation fault flag

(Fault Type C2, , , )

|  | 0.5% | 1.0% | 1.5% | 2.0% | 2.5% | 3.0% | 3.5% | 4.0% | 4.5% | 5.0% |
| --- | --- | --- | --- | --- | --- | --- | --- | --- | --- | --- |
| 0.6 | 0 | 2 | 2 | 2 | 2 | 2 | 2 | 2 | 2 | 2 |
| 0.7 | 0 | 2 | 2 | 2 | 2 | 2 | 2 | 2 | 2 | 2 |
| 0.8 | 0 | 2 | 2 | 2 | 2 | 2 | 2 | 2 | 2 | 2 |
| 0.9 | 0 | 2 | 2 | 2 | 2 | 2 | 2 | 2 | 2 | 2 |
| 1.0 | 0 | 2 | 2 | 2 | 2 | 2 | 2 | 2 | 2 | 2 |
| 1.1 | 2 | 2 | 2 | 2 | 2 | 2 | 2 | 2 | 2 | 2 |
| 1.2 | 2 | 2 | 2 | 2 | 2 | 2 | 2 | 2 | 2 | 2 |
| 1.3 | 2 | 2 | 2 | 2 | 2 | 2 | 2 | 2 | 2 | 2 |
| 1.4 | 2 | 2 | 2 | 2 | 2 | 2 | 2 | 2 | 2 | 2 |
| 1.5 | 2 | 2 | 2 | 2 | 2 | 2 | 2 | 2 | 2 | 2 |
| 1.6 | 2 | 2 | 2 | 2 | 2 | 2 | 2 | 2 | 2 | 2 |
| 1.7 | 2 | 2 | 2 | 2 | 2 | 2 | 2 | 2 | 2 | 2 |
| 1.8 | 2 | 2 | 2 | 2 | 2 | 2 | 2 | 2 | 2 | 2 |
| 1.9 | 2 | 2 | 2 | 2 | 2 | 2 | 2 | 2 | 2 | 2 |
| 2.0 | 2 | 2 | 2 | 2 | 2 | 2 | 2 | 2 | 2 | 2 |
| 2.1 | 2 | 2 | 2 | 2 | 2 | 2 | 2 | 2 | 2 | 2 |
| 2.2 | 2 | 2 | 2 | 2 | 2 | 2 | 2 | 2 | 2 | 2 |
| 2.3 | 2 | 2 | 2 | 2 | 2 | 2 | 2 | 2 | 2 | 2 |
| 2.4 | 2 | 2 | 2 | 2 | 2 | 2 | 2 | 2 | 2 | 2 |
| 2.5 | 2 | 2 | 2 | 2 | 2 | 2 | 2 | 2 | 2 | 2 |
| 2.6 | 2 | 2 | 2 | 2 | 2 | 2 | 2 | 2 | 2 | 2 |
| 2.7 | 2 | 2 | 2 | 2 | 2 | 2 | 2 | 2 | 2 | 2 |
| 2.8 | 2 | 2 | 2 | 2 | 2 | 2 | 2 | 2 | 2 | 2 |
| 2.9 | 2 | 2 | 2 | 2 | 2 | 2 | 2 | 2 | 2 | 2 |
| 3.0 | 2 | 2 | 2 | 2 | 2 | 2 | 2 | 2 | 2 | 2 |
| 3.1 | 2 | 2 | 2 | 2 | 2 | 2 | 2 | 2 | 0 | 2 |
| 3.2 | 2 | 2 | 2 | 2 | 2 | 2 | 2 | 2 | 0 | 2 |
| 3.3 | 2 | 2 | 2 | 2 | 2 | 2 | 2 | 0 | 2 | 2 |
| 3.4 | 2 | 2 | 2 | 2 | 2 | 2 | 2 | 0 | 2 | 2 |
| 3.5 | 2 | 2 | 2 | 2 | 2 | 2 | 2 | 2 | 0 | 0 |
| 3.6 | 2 | 2 | 2 | 2 | 2 | 2 | 2 | 2 | 2 | 2 |
| 3.7 | 2 | 2 | 2 | 2 | 2 | 2 | 2 | 2 | 2 | 2 |
| 3.8 | 2 | 2 | 2 | 2 | 2 | 2 | 0 | 2 | 2 | 0 |
| 3.9 | 2 | 2 | 2 | 2 | 2 | 2 | 2 | 2 | 2 | 2 |
| 4.0 | 2 | 2 | 2 | 2 | 2 | 2 | 2 | 0 | 2 | 2 |
| 4.1 | 2 | 2 | 2 | 2 | 2 | 2 | 2 | 2 | 2 | 0 |
| 4.2 | 2 | 2 | 2 | 2 | 2 | 2 | 2 | 0 | 2 | 2 |
| 4.3 | 2 | 2 | 2 | 2 | 2 | 2 | 2 | 2 | 0 | 2 |
| 4.4 | 2 | 2 | 2 | 2 | 2 | 2 | 2 | 2 | 2 | 2 |
| 4.5 | 2 | 2 | 2 | 2 | 2 | 2 | 2 | 2 | 2 | 2 |
